# Supplementary material for: A stable ultrastructural pattern despite variable cell size in Lithothamnion corallioides
Source: Copernicus journal article supplement (doi:10.5194/bg-2021-140), 2021-08-03

Supplement 1

Results of ANOVA tests performed to evaluate the differences in the long cell morphometry and wall thickness of *L. corallioides* collected in different sampling sites. Statistically significant p-values are given in bold. ANOVA test significance at  $\alpha = 0.05$ ; Tukey's test significant at  $p \leq \alpha$ . Any data transformation is indicated on the right side of the table

| <b>One-way ANOVA test (Cell length)</b> |                 |                         |             |              |                 |
|-----------------------------------------|-----------------|-------------------------|-------------|--------------|-----------------|
| Long cells                              |                 |                         |             |              |                 |
|                                         | Df              | Sum sq.                 | Mean sq.    | F value      | Pr(>F)          |
| SITE                                    | 4               | 0.230                   | 0.057       | 68.590       | <b>5.05E-11</b> |
| Residuals                               | 19              | 0.016                   | 0.001       |              |                 |
| Shapiro-Wilk normality test             |                 |                         |             | P=0.109      |                 |
| Bartlett's K-squared                    |                 |                         |             | P=0.798      |                 |
| <b>Tukey's test</b>                     |                 |                         |             |              |                 |
| Multiple comparisons of means           |                 |                         |             |              |                 |
| SITE                                    | Mean difference | 95% confidence interval |             | P. adjusted  |                 |
|                                         | SITE            | lower bound             | upper bound |              |                 |
| Elba-Egadi                              | -0.025          | -0.080                  | 0.030       | 0.661        |                 |
| Morlaix-Egadi                           | 0.158           | 0.103                   | 0.213       | <b>0.000</b> |                 |
| Pontine-Egadi                           | -0.152          | -0.211                  | -0.094      | <b>0.000</b> |                 |
| Santa Caterina-Egadi                    | -0.044          | -0.099                  | 0.011       | 0.159        |                 |
| Morlaix-Elba                            | 0.183           | 0.128                   | 0.238       | <b>0.000</b> |                 |
| Pontine-Elba                            | -0.128          | -0.186                  | -0.069      | <b>0.000</b> |                 |
| Santa Caterina-Elba                     | -0.019          | -0.074                  | 0.036       | 0.833        |                 |
| Pontine-Morlaix                         | -0.311          | -0.369                  | -0.252      | <b>0.000</b> |                 |
| Santa Caterina-Morlaix                  | -0.202          | -0.257                  | -0.147      | <b>0.000</b> |                 |
| Santa Caterina-Pontine                  | 0.109           | 0.050                   | 0.167       | <b>0.000</b> |                 |

| <b>One-way ANOVA test (Lumen length)</b> |    |         |          |         |        |
|------------------------------------------|----|---------|----------|---------|--------|
| Long cells                               |    |         |          |         |        |
|                                          | Df | Sum sq. | Mean sq. | F value | Pr(>F) |

|                                                      |                 |                         |             |              |                 |
|------------------------------------------------------|-----------------|-------------------------|-------------|--------------|-----------------|
| SITE                                                 | 4               | 0.312                   | 0.078       | 78.110       | <b>1.59E-11</b> |
| Residuals                                            | 19              | 0.019                   | 0.001       |              |                 |
| Shapiro-Wilk normality test                          |                 |                         |             | P=0.097      |                 |
| Bartlett's K-squared                                 |                 |                         |             | P=0.846      |                 |
| <b>Tukey's test</b><br>Multiple comparisons of means |                 |                         |             |              |                 |
| SITE                                                 | Mean difference | 95% confidence interval |             | P. adjusted  |                 |
|                                                      | SITE            | lower bound             | upper bound |              |                 |
| Elba-Egadi                                           | -0.010          | -0.070                  | 0.050       | 0.985        |                 |
| Morlaix-Egadi                                        | 0.181           | 0.121                   | 0.241       | <b>0.000</b> |                 |
| Pontine-Egadi                                        | -0.191          | -0.255                  | -0.127      | <b>0.000</b> |                 |
| Santa Caterina-Egadi                                 | -0.021          | -0.081                  | 0.039       | 0.831        |                 |
| Morlaix-Elba                                         | 0.191           | 0.131                   | 0.251       | <b>0.000</b> |                 |
| Pontine-Elba                                         | -0.181          | -0.245                  | -0.117      | <b>0.000</b> |                 |
| Santa Caterina-Elba                                  | -0.011          | -0.071                  | 0.049       | 0.982        |                 |
| Pontine-Morlaix                                      | -0.372          | -0.435                  | -0.308      | <b>0.000</b> |                 |
| Santa Caterina-Morlaix                               | -0.202          | -0.262                  | -0.142      | <b>0.000</b> |                 |
| Santa Caterina-Pontine                               | 0.170           | 0.106                   | 0.234       | <b>0.000</b> |                 |

|                                                      |                 |                         |          |             |                 |
|------------------------------------------------------|-----------------|-------------------------|----------|-------------|-----------------|
| <b>One-way ANOVA test (Cell sw)</b><br>Long cells    |                 |                         |          |             |                 |
|                                                      | Df              | Sum sq.                 | Mean sq. | F value     | Pr(>F)          |
| SITE                                                 | 4               | 1.790                   | 0.447    | 7.207       | <b>1.05E-03</b> |
| Residuals                                            | 19              | 1.180                   | 0.062    |             |                 |
| Shapiro-Wilk normality test                          |                 |                         |          | P=0.362     |                 |
| Bartlett's K-squared                                 |                 |                         |          | P=0.068     |                 |
| <b>Tukey's test</b><br>Multiple comparisons of means |                 |                         |          |             |                 |
| SITE                                                 | Mean difference | 95% confidence interval |          | P. adjusted |                 |

|                        | SITE   | lower bound | upper bound |              |
|------------------------|--------|-------------|-------------|--------------|
| Elba-Egadi             | 0.347  | -0.127      | 0.821       | 0.222        |
| Morlaix-Egadi          | -0.165 | -0.639      | 0.309       | 0.830        |
| Pontine-Egadi          | 0.487  | -0.016      | 0.990       | 0.060        |
| Santa Caterina-Egadi   | 0.517  | 0.043       | 0.991       | <b>0.028</b> |
| Morlaix-Elba           | -0.512 | -0.986      | -0.038      | <b>0.030</b> |
| Pontine-Elba           | 0.140  | -0.362      | 0.643       | 0.915        |
| Santa Caterina-Elba    | 0.170  | -0.304      | 0.644       | 0.814        |
| Pontine-Morlaix        | 0.652  | 0.150       | 1.155       | <b>0.008</b> |
| Santa Caterina-Morlaix | 0.682  | 0.208       | 1.156       | <b>0.003</b> |
| Santa Caterina-Pontine | 0.030  | -0.473      | 0.533       | 1.000        |

Results of ANOVA tests performed to evaluate the differences in the short cell morphometry and wall thickness of *L. corallioides* collected in different sampling sites. Statistically significant p-values are given in bold. ANOVA test significance at  $\alpha = 0.05$ ; Tukey's test significant at  $p \leq \alpha$ . Any data transformation is indicated on the right side of the table.

| <b>One-way ANOVA test (Lumen length)</b> |                 |                         |             |              |                 |
|------------------------------------------|-----------------|-------------------------|-------------|--------------|-----------------|
| Short cells                              |                 |                         |             |              |                 |
|                                          | Df              | Sum sq.                 | Mean sq.    | F value      | Pr(>F)          |
| SITE                                     | 4               | 145.453                 | 36.363      | 30.573       | <b>4.86E-08</b> |
| Residuals                                | 19              | 22.598                  | 1.189       |              |                 |
| Shapiro-Wilk normality test              |                 |                         |             | P=0.122      |                 |
| Bartlett's K-squared                     |                 |                         |             | P=0.118      |                 |
| <b>Tukey's test</b>                      |                 |                         |             |              |                 |
| Multiple comparisons of means            |                 |                         |             |              |                 |
| SITE                                     | Mean difference | 95% confidence interval |             | P. adjusted  |                 |
|                                          | SITE            | lower bound             | upper bound |              |                 |
| Elba-Egadi                               | 3.122           | 1.048                   | 5.196       | <b>0.002</b> |                 |
| Morlaix-Egadi                            | 3.907           | 1.833                   | 5.982       | <b>0.000</b> |                 |
| Pontine-Egadi                            | -3.281          | -5.481                  | -1.081      | <b>0.002</b> |                 |
| Santa Caterina-Egadi                     | 0.313           | -1.761                  | 2.387       | 0.991        |                 |
| Morlaix-Elba                             | 0.785           | -1.289                  | 2.859       | 0.785        |                 |
| Pontine-Elba                             | -6.404          | -8.604                  | -4.203      | <b>0.000</b> |                 |
| Santa Caterina-Elba                      | -2.809          | -4.883                  | -0.735      | <b>0.005</b> |                 |
| Pontine-Morlaix                          | -7.189          | -9.389                  | -4.989      | <b>0.000</b> |                 |
| Santa Caterina-Morlaix                   | -3.594          | -5.668                  | -1.520      | <b>0.000</b> |                 |
| Santa Caterina-Pontine                   | 3.595           | 1.394                   | 5.795       | <b>0.001</b> |                 |

| Short cells |    |         |          |         |          |
|-------------|----|---------|----------|---------|----------|
|             | Df | Sum sq. | Mean sq. | F value | Pr(>F)   |
| SITE        | 4  | 0.053   | 0.013    | 1.138   | 7.64E-02 |

|                             |    |       |         |
|-----------------------------|----|-------|---------|
| Residuals                   | 19 | 0.222 | 0.012   |
| Shapiro-Wilk normality test |    |       | P=0.069 |
| Bartlett's K-squared        |    |       | P=0.589 |

| <b>One-way ANOVA test (Cell pw)</b> |                 |                         |             |              |                 |
|-------------------------------------|-----------------|-------------------------|-------------|--------------|-----------------|
| Short cells                         |                 |                         |             |              |                 |
|                                     | Df              | Sum sq.                 | Mean sq.    | F value      | Pr(>F)          |
| SITE                                | 4               | 1.312                   | 0.328       | 10.090       | <b>1.82E-04</b> |
| Residuals                           | 18              | 0.585                   | 0.033       |              |                 |
| Shapiro-Wilk normality test         |                 |                         |             | P=0.646      |                 |
| Bartlett's K-squared                |                 |                         |             | P=0.208      |                 |
| <b>Tukey's test</b>                 |                 |                         |             |              |                 |
| Multiple comparisons of means       |                 |                         |             |              |                 |
| SITE                                | Mean difference | 95% confidence interval |             | P. adjusted  |                 |
|                                     | SITE            | lower bound             | upper bound |              |                 |
| Elba-Egadi                          | -0.211          | -0.556                  | 0.133       | 0.375        |                 |
| Morlaix-Egadi                       | -0.245          | -0.590                  | 0.099       | 0.242        |                 |
| Pontine-Egadi                       | 0.346           | -0.020                  | 0.712       | 0.069        |                 |
| Santa Caterina-Egadi                | -0.373          | -0.739                  | -0.008      | <b>0.044</b> |                 |
| Morlaix-Elba                        | -0.034          | -0.379                  | 0.311       | 0.998        |                 |
| Pontine-Elba                        | 0.558           | 0.192                   | 0.923       | <b>0.002</b> |                 |
| Santa Caterina-Elba                 | -0.162          | -0.528                  | 0.204       | 0.672        |                 |
| Pontine-Morlaix                     | 0.592           | 0.226                   | 0.957       | <b>0.001</b> |                 |
| Santa Caterina-Morlaix              | -0.128          | -0.494                  | 0.238       | 0.825        |                 |
| Santa Caterina-Pontine              | -0.719          | -1.105                  | -0.334      | <b>0.000</b> |                 |

Results of Kruskal-Wallis test performed to evaluate the differences in the cell length of *L. corallioides* collected in different sampling sites. Test significance at  $\alpha = 0.05$

| <b>Kruskal-Wallis test (Cell length)</b> |                           |                    |                          |               |
|------------------------------------------|---------------------------|--------------------|--------------------------|---------------|
| Short cells                              |                           |                    |                          |               |
|                                          | Df                        | $\chi^2$           | P                        |               |
| SITE                                     | 4                         | 16.468             | <b>0.002</b>             |               |
| <b>Dunn's test</b>                       |                           |                    |                          |               |
| Comparisons by SITE (Bonferroni)         |                           |                    |                          |               |
| Z<br>P.<br>adjusted                      | Egadi                     | Elba               | Morlaix                  | Pontine       |
| Elba                                     | 0.537826<br>1             |                    |                          |               |
| Morlaix                                  | -0.35855                  | -0.89638<br>1      |                          |               |
| Pontine                                  | 3.063535<br><b>0.0109</b> | 2.556467<br>0.0529 | 3.40158<br><b>0.0033</b> |               |
| Santa<br>Caterina                        | 2.061669<br>0.1962        | 1.523842<br>0.6377 | 2.42022<br>0.0776        | -1.11978<br>1 |

Statistical correlations were used to evaluate the relationship between each morphological and calcification parameter measured in the long cells of *L. corallioides*. Test significance at  $p < 0.05$ .

| correlation | Long cells     |                | p-value         |
|-------------|----------------|----------------|-----------------|
| Spearman's  | cell.length    | lumen.length   | <b>&lt;0.05</b> |
| Spearman's  | cell.sw        | lumen.length   | <b>&lt;0.05</b> |
| Spearman's  | cell.length    | cell.diameter  | >0.05           |
| Spearman's  | cell.length    | cell.sw        | <b>&lt;0.05</b> |
| Spearman's  | cell.pw        | cell.sw        | <b>&lt;0.05</b> |
| Spearman's  | lumen.diameter | lumen.length   | <b>&lt;0.05</b> |
| Pearson's   | lumen.diameter | cell.diameter  | <b>&lt;0.05</b> |
| Pearson's   | cell.sw        | lumen.diameter | <b>&lt;0.05</b> |
| Pearson's   | cell.sw        | cell.diameter  | >0.05           |

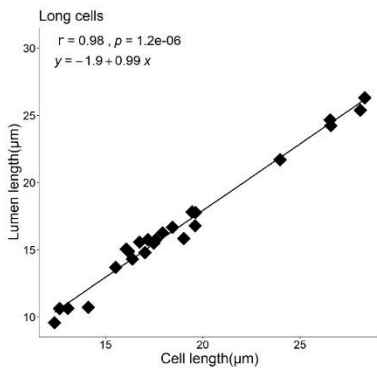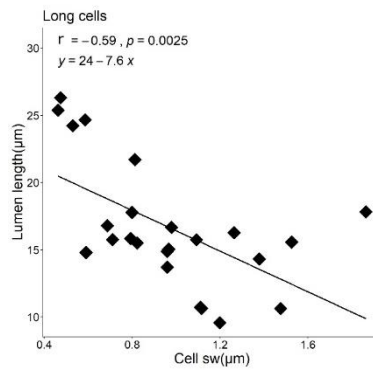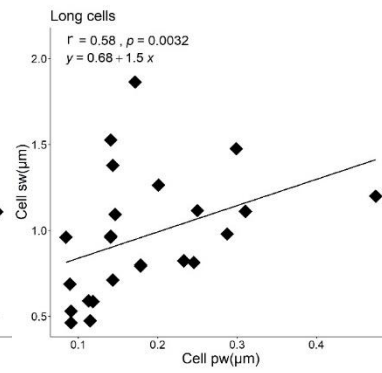

Statistical correlations were used to evaluate the relationship between each morphological and calcification parameter measured in the long cells of *L. corallioides*. Test significance at  $p < 0.05$ .

| correlation | Short cells    |                | p-value         |
|-------------|----------------|----------------|-----------------|
| Pearson's   | cell.length    | lumen.length   | <b>&lt;0.05</b> |
| Spearman's  | cell.sw        | lumen.length   | >0.05           |
| Pearson's   | cell.length    | cell.diameter  | >0.05           |
| Spearman's  | cell.length    | cell.sw        | >0.05           |
| Spearman's  | cell.pw        | cell.sw        | >0.05           |
| Pearson's   | lumen.diameter | lumen.length   | <b>&lt;0.05</b> |
| Pearson's   | lumen.diameter | cell.diameter  | >0.05           |
| Spearman's  | cell.sw        | lumen.diameter | >0.05           |
| Spearman's  | cell.sw        | cell.diameter  | >0.05           |

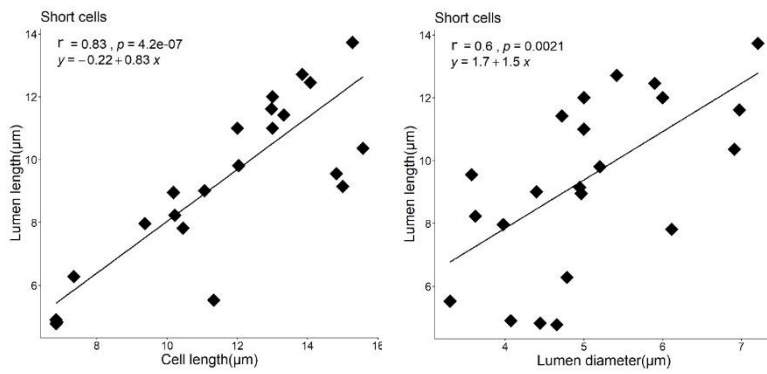

Supplement: Supplementary file 1 [file bg-2021-140-supplement.pdf]
